# Supplementary material for: Paper-Supported High-Throughput 3D Culturing, Trapping, and Monitoring of Caenorhabditis Elegans
Source: MDPI journal article supplement (doi:10.3390/mi11010099), 2020-01-17
Supplement: s1 [file s1]

# Supplementary Materials: Paper-Supported High-Throughput 3-D Culturing, Trapping, and Monitoring of *Caenorhabditis Elegans*

Mehdi Tahernia, Maedeh Mohammadifar and Seokheun Choi

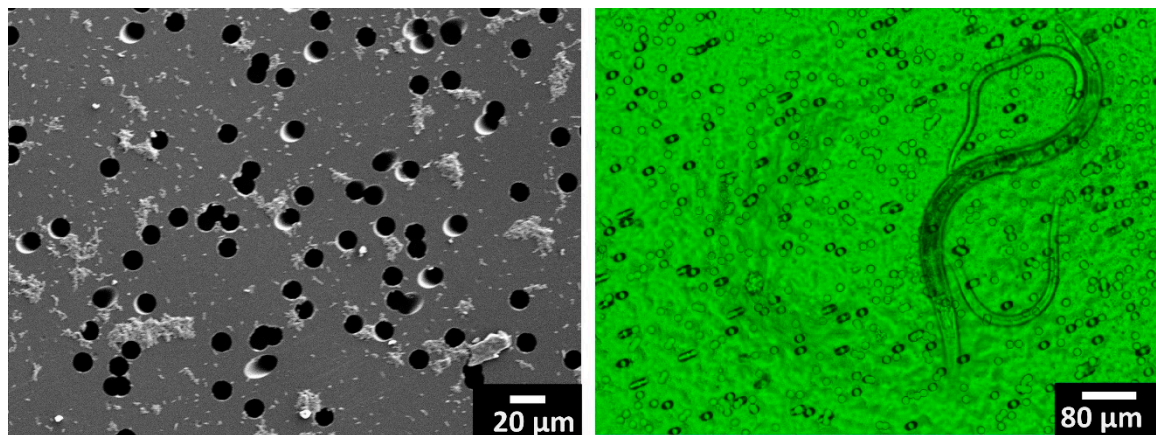

Figure S1. (a) SEM and (b) microscopic image of polycarbonate.

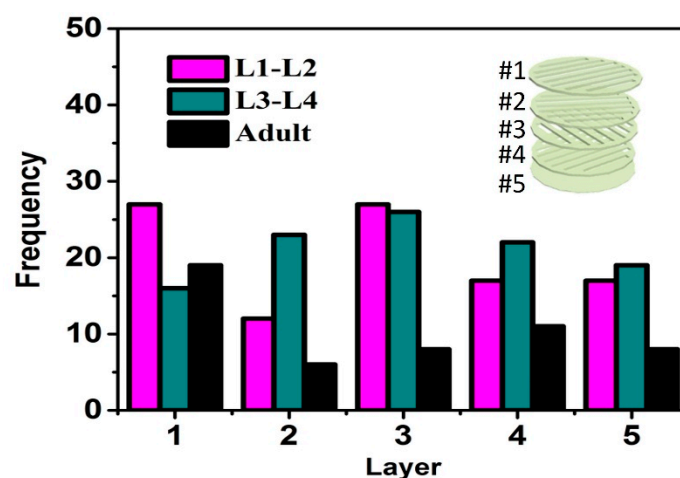

Figure S2. Number of *C. elegans* distributed in the individual layers. .
